# Supplementary material for: Colorimetric aptasensor based on temporally controllable light-stimulated oxidase-mimicking fluorescein for the sensitive detection of exosomes in mild conditions
Source: Royal Society of Chemistry journal article supplement (doi:10.1039/d4ay00561a), 2024-01-01
Supplement: d4ay00561a1.pdf [file d4ay00561a1.pdf]

## Supporting Information

### **Colorimetric Aptasensor Based on Fluorescein as Temporal Controllable Light-Stimulated Oxidase Mimicking for Sensitive Detection of Exosomes in Mild Condition**

Li-e Zheng<sup>1,2</sup>, Min Huang<sup>1,2</sup>, Yiyang Liu<sup>3</sup>, Qiufang Bao<sup>1,2</sup>, Yuxiu Huang<sup>1,2</sup>, Yuhong Ye<sup>4</sup>, Mengmeng Liu<sup>5\*</sup>, Pengming Sun<sup>6,7,8\*</sup>

<sup>1</sup> Department of Gynecology, The First Affiliated Hospital of Fujian Medical University, Fuzhou, Fujian 350005, China

<sup>2</sup> Department of Gynecology, National Regional Medical Center, Binhai Campus of the First Affiliated Hospital, Fujian Medical University, Fuzhou 350212, China

<sup>3</sup> Department of Epidemiology and Health Statistics, School of Public Health, Fujian Medical University, Fuzhou 350122, China

<sup>4</sup> Department of Pathology, The First Affiliated Hospital of Fujian Medical University, Fuzhou, Fujian 350005, China

<sup>5</sup> Department of Pharmacy, The First Affiliated Hospital of Fujian Medical University, Fuzhou, Fujian 350005, China

<sup>6</sup> Laboratory of Gynecologic Oncology, Fujian Maternity and Child Health Hospital, College of Clinical Medicine for Obstetrics & Gynecology and Pediatrics, Fujian Medical University, Fuzhou 350001, Fujian, China

<sup>7</sup> Fujian Key Laboratory of Women and Children's Critical Diseases Research, Fujian Maternity and Child Health Hospital (Fujian Women and Children's Hospital), Fuzhou 350001, Fujian, China

<sup>8</sup> Fujian Clinical Research Center for Gynecological Oncology, Fujian Maternity and Child Health Hospital (Fujian Obstetrics and Gynecology Hospital), Fuzhou 350001, Fujian, China

Corresponding author

\*Mengmeng Liu, E-mail: [imm0305@fjmu.edu.cn](mailto:imm0305@fjmu.edu.cn)

\*Pengming Sun, E-mail: [sunpengming854@163.com](mailto:sunpengming854@163.com), [fmsun1975@fjmu.edu.cn](mailto:fmsun1975@fjmu.edu.cn)

**Table S1. The sequence of DNA used in this work**

| Name                    | Sequence (from 5' to 3')                                         |
|-------------------------|------------------------------------------------------------------|
| FITC labeled DNA anchor | Cholesterol-TTTTTTTTTTTTTTTTTTTTTTTTTTTTTTTTTT-FITC              |
| EpCAM aptamer           | Biotin-<br>GCACTACAGAGGTTGCGTCTGTCCCACGTTGTCATGGGGG<br>GTTGGCCTG |
| Random sequence         | Biotin-<br>TTCGTGCAGTCCATTGATGGGTGCAGTTAAATTCCTGCATG<br>AATTAATT |

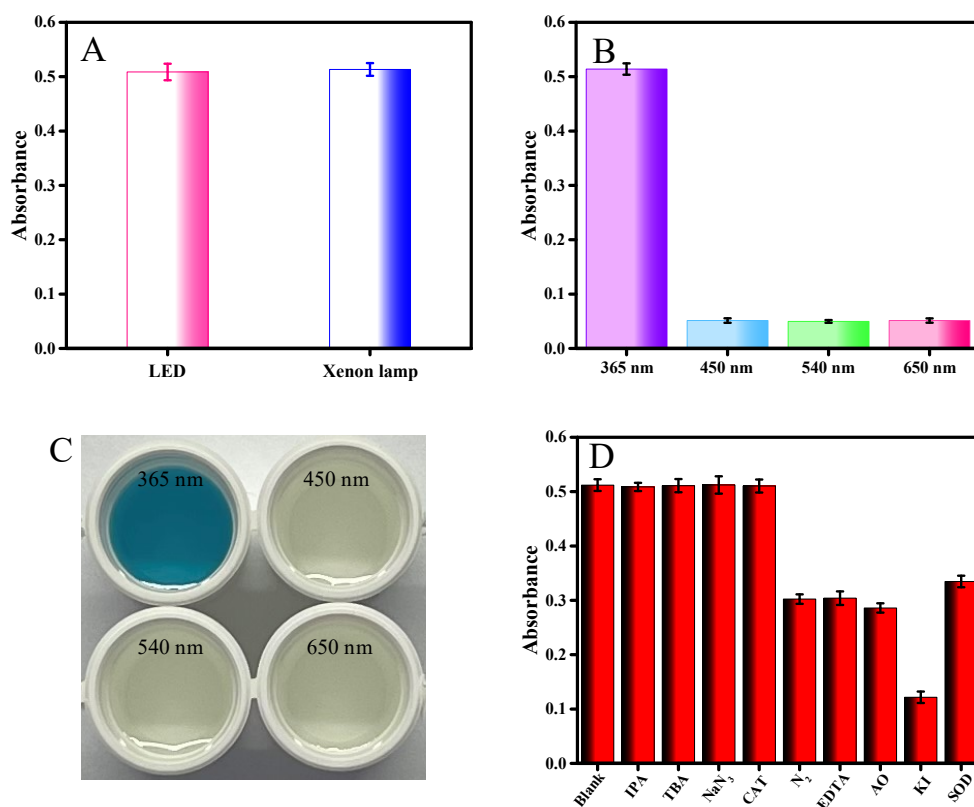

**Figure. S1.** (A) The TMB oxidation by FITC under LED and xenon lights. (B) The TMB oxidation by FITC under LED lights with different wavelengths. (C) The photographs of TMB oxidation by FITC under LED lights with different wavelengths. (D) Effects of scavengers on the TMB-FITC chromogenic reaction under 365 LED

light irradiation.

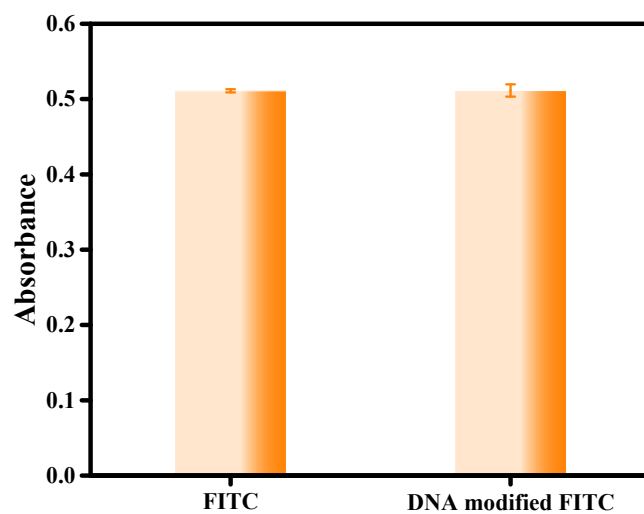

**Figure S2.** The TMB oxidation by free FITC and DNA modified FITC under LED light.

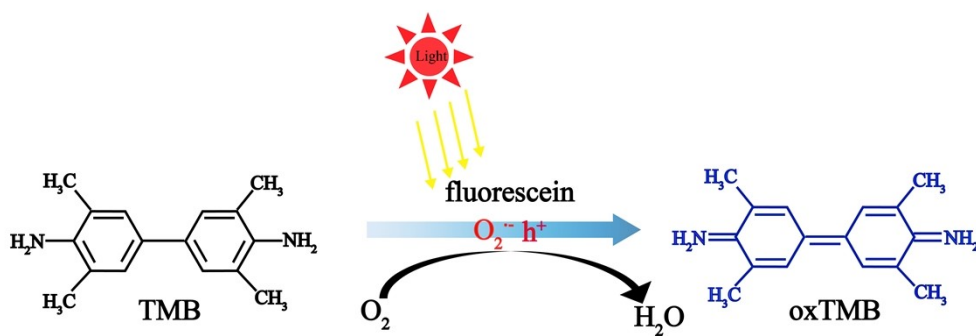

**Figure S3.** Proposed mechanism for light-stimulated oxidase mimicking activity of FITC.

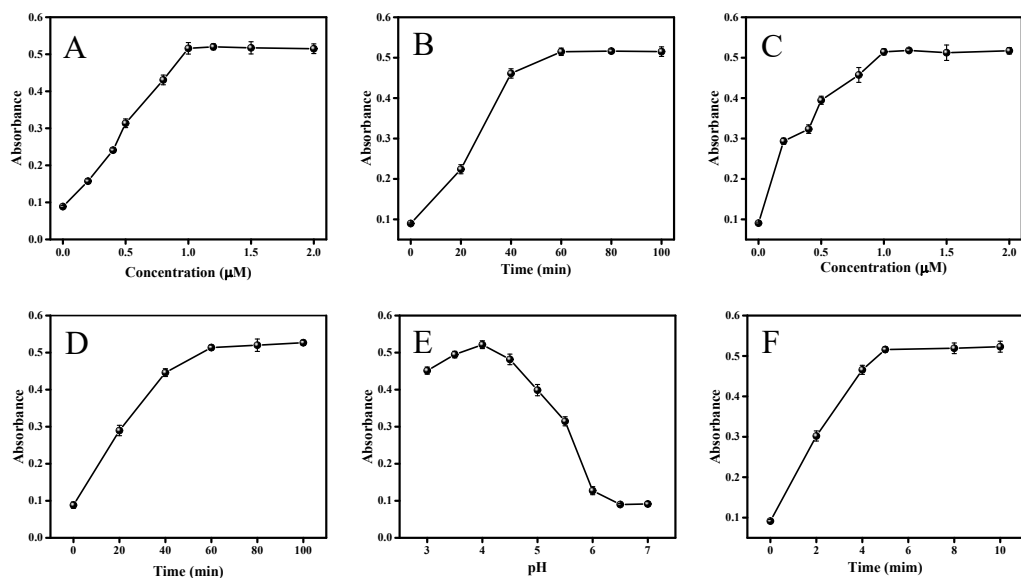

**Figure S4.** The optimization of experimental conditions. Influence of (A) aptamer concentration, (B) the capturing time for exosomes, (C) DNA anchor concentration, (D) incubation time between DNA anchor and exosomes, (E) the pH value for colorimetric reaction, (F) the light irradiation time.

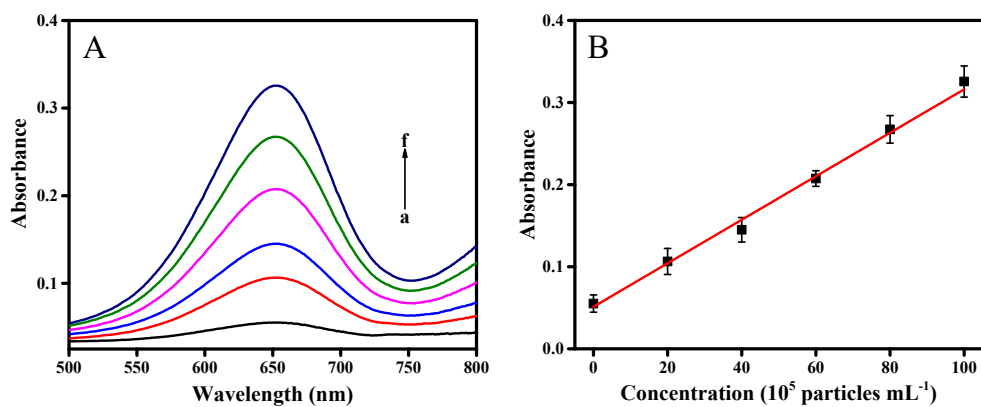

**Figure S5.** (A) UV-vis absorbance toward different exosomes concentrations (from a to f represented  $0, 20.0, 40.0, 60.0, 80.0, 100.0 \times 10^5$  particles  $\text{mL}^{-1}$ ). (B) Linear calibration curve of detection exosomes.

**Table S2. Comparison of the present aptasensor and other methods for exosomes detection**

| Methods                                                                                      |          |  | LOD<br>(particles/mL)                      | Detection range<br>(particles/mL)        | Ref. |
|----------------------------------------------------------------------------------------------|----------|--|--------------------------------------------|------------------------------------------|------|
| An integrated fluorescent nanosensor                                                         | magneto- |  | $1.71 \times 10^6$                         | $2.86 \times 10^6 - 2.86 \times 10^{10}$ | 44   |
| Electrochemical aptasensor based on DNA functionalized covalent organic frameworks           |          |  | $9.66 \times 10^6$                         | $10^7 - 10^{10}$                         | 45   |
| A fluorescent method based on steric hindrance-controlled signal amplification               |          |  | $4.8 \times 10^5$                          | $1.66 \times 10^6 - 1.66 \times 10^9$    | 46   |
| Electrochemical method based on DNA/ferrocene-modified single-walled carbon nanotube         |          |  | $9.38 \times 10^4$                         | $4.66 \times 10^6 - 9.32 \times 10^9$    | 47   |
| DNA-functionalized organic framework capsules                                                | covalent |  | $8.7 \times 10^4$                          | $2.5 \times 10^5 - 2.5 \times 10^{10}$   | 48   |
| A sensor based on in-suit synthesis fluorescent polymers                                     |          |  | $1.161 \times 10^4$                        | $5.00 \times 10^4 - 5.00 \times 10^8$    | 49   |
| Colorimetric aptasensor based on spherical nucleic acid-induced hybridization chain reaction |          |  | $5.0 \times 10^4$                          | $0 - 10^6$                               | 50   |
| A colorimetric aptasensor based on terminal deoxynucleotidyl transferase                     |          |  | $4.5 \times 10^4$                          | $1.0 \times 10^5 - 1.0 \times 10^6$      | 51   |
| Colorimetric and photothermal dual-mode biosensor                                            |          |  | $1.027 \times 10^6$<br>$2.170 \times 10^6$ | $2.0 \times 10^6 - 4.0 \times 10^7$      | 52   |
| A colorimetric aptasensor based on                                                           |          |  | $5.2 \times 10^8$                          | $1.84 \times 10^9 - 2.21 \times 10^{10}$ | 53   |

DNA-capped single-walled carbon  
nanotubes

|                                                                                     |                    |                                     |           |
|-------------------------------------------------------------------------------------|--------------------|-------------------------------------|-----------|
| Dual-modal aptasensor based on<br>acridone derivative                               | $1.3 \times 10^5$  | $5.0 \times 10^6 - 1.0 \times 10^9$ | 54        |
| A colorimetric aptasensor based on<br>light-stimulated oxidase<br>mimicking of FITC | $1.77 \times 10^5$ | $0 - 100 \times 10^5$               | This work |

---

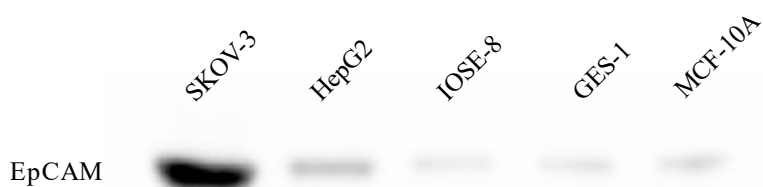

**Figure S6.** The WB images of EpCAM from different cell lines derived exosomes, including SKOV-3, HepG2, IOSE-8, GES-1, and MCF-10A.

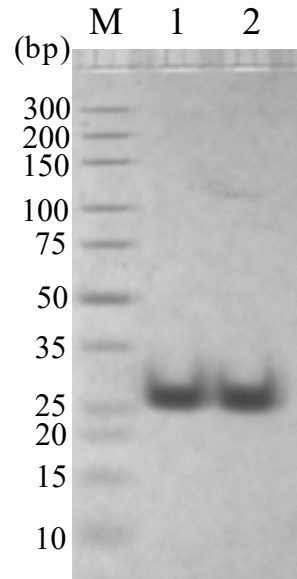

**Figure S7.** PAGE results of the EpCAM aptamer. Lane M: marker, lane 1: EpCAM aptamer in PBS, lane 2: EpCAM aptamer in serum.

**Table S3.** Performance of exosomes and serum CA-125 in OC *versus* HD discrimination (Ninety-five percent CIs are indicated in parentheses)

| Marker              | Sensitivity (%)       | Specificity (%)      | Accuracy (%)          | AUC                      |
|---------------------|-----------------------|----------------------|-----------------------|--------------------------|
| <b>Exosomes</b>     | 93.8<br>(85.4 - 100)  | 100<br>(100)         | 96.3<br>(96.2 - 96.4) | 0.994<br>(0.983 - 1.000) |
| <b>Serum CA-125</b> | 43.8<br>(26.6 - 60.9) | 90.9<br>(78.9 - 100) | 63.0<br>(62.1 - 63.8) | 0.645<br>(0.496 - 0.793) |
